# Supplementary material for: The N‐glycan profile in cortex and hippocampus is altered in Alzheimer disease
Source: PubMed Central journal article supplement — J Neurochem. 2020 Oct 24;159(2):292–304. doi: 10.1111/jnc.15202 (PMC8596851; doi:10.1111/jnc.15202), 2020-10-24
Supplement: JNC-159-292-s001.pdf [file JNC-159-292-s001.pdf]

## Supporting information

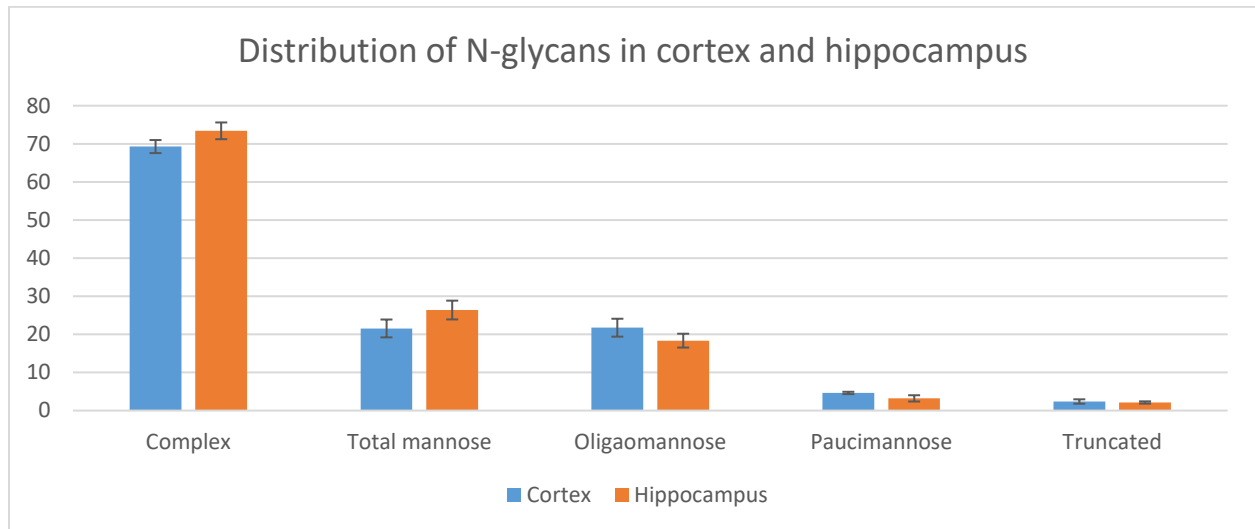

Figure S1. Distribution of human N-glycan classes detected in human cortex and hippocampus control brains. Error bars denote standard deviation from five biological replicates.

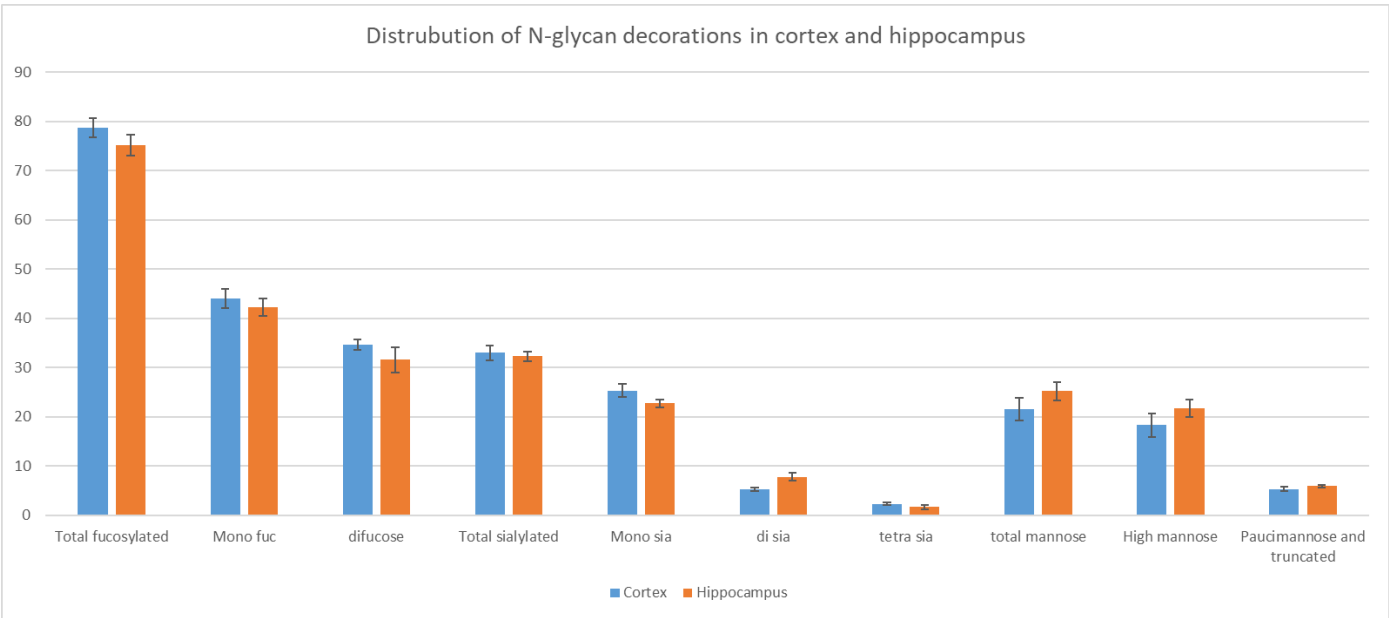

Figure S2. Distribution of type of decorations of N-glycans detected in human cortex and hippocampus control brains. Error bars denote standard deviation from five biological replicates.

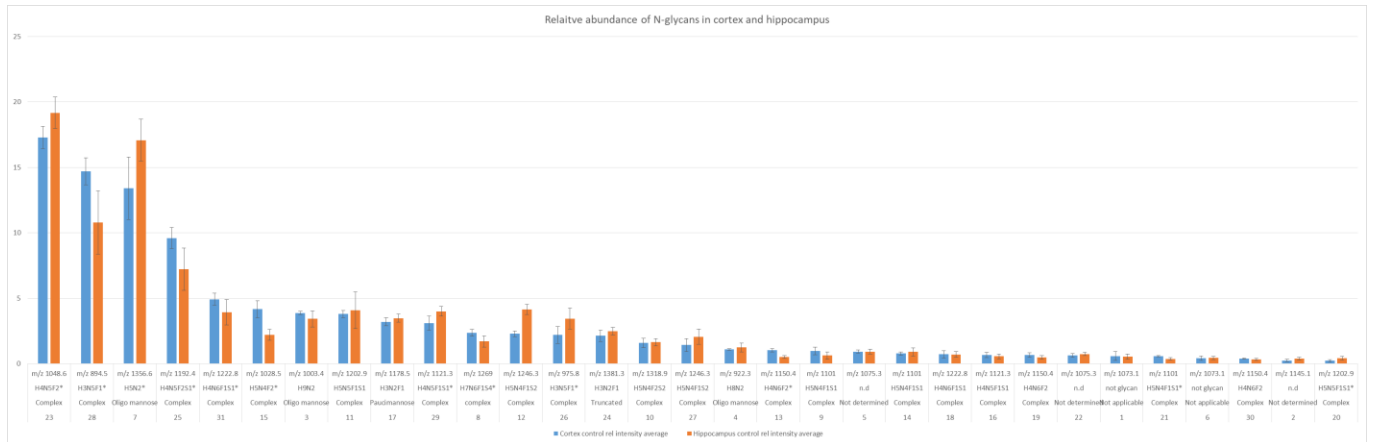

Figure S3. Relative abundance of N-glycans detected in cortex and hippocampus control brains. Each glycan is annotated with m/z value, composition, glycan type and unique retention number. Starred glycans are significantly different in cortex and hippocampus. Error bars denote standard deviation from five biological replicates.
